# Supplementary material
Source: PubMed Central journal article supplement (PMC6856323)
Supplement: AEM.01887-19-s0001.pdf [file AEM.01887-19-s0001.pdf]

1 **Supplementary material**

2  
3 Title: Maternal Antibodies Provide Bank Voles with Strain-Specific Protection  
4 against Infection by the Lyme Disease Pathogen

5  
6 Andrea Gomez-Chamorro, Vanina Heinrich, Anouk Sarr, Owen Roethlisberger, Dolores  
7 Genné, Cindy Bregnard, and Maxime Jacquet, and Maarten J. Voordouw

8  
9 **Table of Contents**

10 **Table S1. *B. afzelii* infection status of the mothers. ....2**

11 **Table S2. *B. afzelii* infection status of the MatAb- offspring. ....4**

12 **Table S3. *B. afzelii* infection status of the MatAb+ offspring. ....6**

13 **Section 1 – Creation of *I. ricinus* nymphs infected with *B. afzelii* .....8**

14 **Section 2 – Antibody response against *B. afzelii* in the bank vole mothers .....8**

15 **Section 3 – Maternal antibody transmission differs among bank vole mothers .....10**

16 **Section 4 – The maternally transmitted IgG antibodies are specific for the OspC antigen ...11**

17 **Section 5 – The *B. afzelii*-specific IgG antibody levels changed dramatically after offspring**  
18 **were exposed to infected nymphs .....12**

19 **Section 6 – The *B. afzelii* spirochete load in the ear tissue changed dramatically after**  
20 **offspring were exposed to infected nymphs.....14**

21 **Section 7 – Culture of tissue biopsies to detect live *B. afzelii* spirochetes .....15**

22 **Section 8 – The *ospC*-specific qPCR to confirm identity of infecting strain .....16**

27 **Table S1. *B. afzelii* infection status of the mothers.** The *B. afzelii* infection status is shown for each of the 20 females in the  
 28 study, of which 13 became mothers and produced offspring. There were 7 uninfected control females that produced 22 MatAb-  
 29 offspring and 6 *B. afzelii*-infected females that produced 20 MatAb+ offspring. All mothers in the uninfected control group tested  
 30 positive for 0 of the 4 criteria whereas all mothers in the infected group tested positive for 3 or 4 criteria.  
 31

| ID <sup>a</sup> | Treat <sup>b</sup> | Male <sup>c</sup> | Offspring <sup>d</sup> | Nymphs <sup>e</sup> | ELISA <sup>f</sup> | Ear <sup>g</sup> | Bladder <sup>h</sup> | Joint <sup>i</sup> | Criteria <sup>j</sup> | Infected <sup>k</sup> |
|-----------------|--------------------|-------------------|------------------------|---------------------|--------------------|------------------|----------------------|--------------------|-----------------------|-----------------------|
| V634            | Control            | V162              | 3                      | 0/0                 | 480                | -                | -                    | -                  | 0                     | No                    |
| V635            | Control            | V523              | 3                      | 0/3                 | 481                | -                | -                    | -                  | 0                     | No                    |
| V639            | Control            | VD4               | 4                      | 0/4                 | 569                | -                | -                    | -                  | 0                     | No                    |
| V643            | Control            | V174              | 3                      | 0/2                 | 503                | -                | -                    | -                  | 0                     | No                    |
| Z533            | Control            | Z57               | 3                      | 0/1                 | 535                | -                | -                    | -                  | 0                     | No                    |
| Z536            | Control            | Z59               | 4                      | 0/1                 | 506                | -                | -                    | -                  | 0                     | No                    |
| Z540            | Control            | Z109              | 2                      | 0/3                 | 513                | -                | -                    | -                  | 0                     | No                    |
| V637            | Control            | V184              | 0                      | 0/0                 | 1104               | -                | -                    | -                  | 0                     | No                    |
| Z539            | Control            | Z107              | 0                      | 0/1                 | 1099               | -                | -                    | -                  | 0                     | No                    |
| V631            | Infected           | V141              | 5                      | 3/3                 | 6611               | +                | +                    | +                  | 4                     | Yes                   |
| V662            | Infected           | V185              | 2                      | 1/1                 | 6162               | -                | +                    | +                  | 3                     | Yes                   |
| V665            | Infected           | V242              | 3                      | 2/2                 | 3800               | +                | +                    | +                  | 4                     | Yes                   |
| V666            | Infected           | V151              | 2                      | 0/1                 | 4135               | +                | +                    | +                  | 4                     | Yes                   |
| V667            | Infected           | V146              | 4                      | 3/4                 | 1352               | +                | +                    | +                  | 4                     | Yes                   |
| Z538            | Infected           | Z101              | 4                      | 1/2                 | 3530               | -                | +                    | +                  | 4                     | Yes                   |
| V632            | Infected           | V162              | 0                      | 1/2                 | 6409               | +                | +                    | +                  | 4                     | Yes                   |
| V636            | Infected           | V153              | 0                      | 1/1                 | 2616               | +                | +                    | +                  | 4                     | Yes                   |
| V638            | Infected           | V208              | 0                      | 1/1                 | 7630               | -                | +                    | +                  | 3                     | Yes                   |
| V641            | Infected           | V154              | 0                      | 2/2                 | 10913              | +                | +                    | +                  | 4                     | Yes                   |
| Z534            | Infected           | Z108              | 0                      | 1/2                 | 8150               | +                | +                    | +                  | 4                     | Yes                   |

32  
 33 <sup>a</sup> ID is the unique identification number of each female bank vole that was mated to produce offspring.

34 b Treatment has two levels: Control and Infected. Control females were infested with uninfected nymphs whereas infected females  
35 were infested with nymphs infected with *B. afzelii* strain NE4049.  
36 c Male refers to the identity of the male bank vole that sired the offspring.  
37 d Offspring is the number of offspring that were produced by each female bank vole.  
38 e Nymphs gives a fraction where the numerator and denominator refer to the number of engorged *B. afzelii*-infected nymphs and the  
39 number of engorged nymphs, respectively, collected for each female bank vole.  
40 f ELISA absorbance values indicate the strength of the IgG antibody response against *B. afzelii*. Individuals with absorbance values >  
41 2000 are infected with *B. afzelii* strain NE4049. Absorbance values were obtained from a commercial Lyme disease ELISA.  
42 g Ear indicates whether ear tissue tested positive or negative for *B. afzelii* spirochetes using the qPCR assay.  
43 h Bladder indicates whether bladder tissue tested positive or negative for *B. afzelii* spirochetes using the qPCR assay.  
44 i Joint indicates whether joint tissue tested positive or negative for *B. afzelii* spirochetes using the qPCR assay.  
45 j Criteria is the number of the four infection criteria for which each female tested positive for *B. afzelii*.  
46 k Infected refers to whether the female is considered to be infected with *B. afzelii* (Yes) or not (No).  
47

48 **Table S2. *B. afzelii* infection status of the MatAb- offspring.** Infection status of the MatAb- offspring is shown following the  
 49 infectious challenge via tick bite with *B. afzelii* strain NE4049 or *B. afzelii* strain Fin-Jyv-A3. The 22 MatAb- offspring were  
 50 descended from the 7 mothers that were uninfected. The 6 infection criteria for the offspring are ELISA2, Biop2, Ear, Joint, Bladder,  
 51 and Culture. Offspring that tested positive for 0 or 1 of the 6 infection criteria were considered as uninfected. Offspring that tested  
 52 positive for 4 or more of the 6 infection criteria were considered as infected with *B. afzelii*.

| ID1 <sub>a</sub> | ID2 <sub>b</sub> | Strain <sub>c</sub> | Nymphs <sub>d</sub> | ELISA1 <sub>e</sub> | Biop1 <sub>f</sub> | ELISA2 <sub>g</sub> | Biop2 <sub>h</sub> | Ear <sub>i</sub> | Joint <sub>j</sub> | Bladder <sub>k</sub> | Culture <sub>l</sub> | Criteria <sub>m</sub> | Infected <sub>n</sub> |
|------------------|------------------|---------------------|---------------------|---------------------|--------------------|---------------------|--------------------|------------------|--------------------|----------------------|----------------------|-----------------------|-----------------------|
| V643             | V725             | NE4049              | 2/3                 | 621                 | 0                  | 4549                | 18                 | -                | +                  | +                    | +                    | 5/6                   | Yes                   |
| V643             | V728             | NE4049              | 4/4                 | 556                 | 0                  | 8152                | 32                 | +                | +                  | +                    | +                    | 6/6                   | Yes                   |
| V634             | V735             | NE4049              | 1/2                 | 627                 | 0                  | 5979                | 46                 | +                | +                  | +                    | +                    | 6/6                   | Yes                   |
| V635             | V740             | NE4049              | 4/4                 | 479                 | 0                  | 6820                | 20                 | +                | +                  | +                    | +                    | 6/6                   | Yes                   |
| V639             | V752             | NE4049              | 2/2                 | 413                 | 0                  | 3950                | 129                | +                | -                  | +                    | +                    | 5/6                   | Yes                   |
| V639             | V753             | NE4049              | 0/2                 | 579                 | 0                  | 847                 | 0                  | NA               | NA                 | NA                   | -                    | 0/3 <sub>o</sub>      | No                    |
| Z536             | Z554             | NE4049              | 3/3                 | 474                 | 0                  | 6543                | 1326               | +                | -                  | +                    | -                    | 4/6                   | Yes                   |
| Z533             | Z558             | NE4049              | 1/2                 | NA                  | 0                  | NA                  | 78                 | NA               | NA                 | NA                   | NA                   | 1/1 <sub>p</sub>      | Yes                   |
| Z540             | Z562             | NE4049              | 2/2                 | 413                 | 0                  | 4579                | 13                 | +                | +                  | +                    | +                    | 6/6                   | Yes                   |
| V643             | V727             | Fin-Jyv-A3          | 2/2                 | 575                 | 0                  | 5518                | 139                | +                | +                  | +                    | +                    | 6/6                   | Yes                   |
| V634             | V736             | Fin-Jyv-A3          | 1/1                 | 627                 | 0                  | 6016                | 163                | +                | +                  | +                    | +                    | 6/6                   | Yes                   |
| V634             | V737             | Fin-Jyv-A3          | 2/4                 | 603                 | 0                  | 8288                | 377                | +                | +                  | +                    | +                    | 6/6                   | Yes                   |
| V635             | V741             | Fin-Jyv-A3          | 3/3                 | 543                 | 0                  | 3602                | 1022               | +                | +                  | +                    | -                    | 5/6                   | Yes                   |
| V635             | V742             | Fin-Jyv-A3          | 1/2                 | 594                 | 0                  | 6451                | 367                | +                | +                  | +                    | +                    | 6/6                   | Yes                   |
| V639             | V754             | Fin-Jyv-A3          | 3/3                 | 403                 | 0                  | 7993                | 27                 | +                | +                  | +                    | +                    | 6/6                   | Yes                   |
| V639             | V755             | Fin-Jyv-A3          | 4/4                 | 449                 | 0                  | 5043                | 45                 | +                | +                  | +                    | +                    | 6/6                   | Yes                   |
| Z536             | Z556             | Fin-Jyv-A3          | 1/3                 | 529                 | 0                  | 6390                | 41                 | +                | +                  | +                    | +                    | 6/6                   | Yes                   |
| Z536             | Z557             | Fin-Jyv-A3          | 3/3                 | 420                 | 0                  | 6575                | 190                | +                | +                  | +                    | +                    | 6/6                   | Yes                   |
| Z533             | Z560             | Fin-Jyv-A3          | 2/2                 | 488                 | 0                  | 5397                | 146                | +                | +                  | +                    | -                    | 5/6                   | Yes                   |
| Z540             | Z563             | Fin-Jyv-A3          | 4/4                 | 594                 | 0                  | 4555                | 2                  | +                | +                  | +                    | -                    | 5/6                   | Yes                   |
| Z536             | Z555             | Control             | 0/3                 | 351                 | 0                  | 389                 | 0                  | -                | -                  | -                    | -                    | 0/6                   | No                    |
| Z533             | Z561             | Control             | 0/4                 | 529                 | 0                  | 612                 | 0                  | -                | -                  | -                    | -                    | 0/6                   | No                    |

53 a ID1 is the unique identification number of each mother bank vole that give birth to the offspring.  
54 b ID2 is the unique identification number of each offspring bank vole.  
55 c Strain refers to the strain of *B. afzelii* with which the offspring were challenged via tick bite at 35 days post-birth (PB): strain  
56 NE4049 or strain Fin-Jyv-A3.  
57 d Nymphs gives a fraction where the numerator and denominator refer to the number of engorged *B. afzelii*-infected nymphs and the  
58 number of engorged nymphs, respectively, collected for each offspring bank vole.  
59 e ELISA1 absorbance values indicate the level of maternally transmitted *B. afzelii*-specific IgG antibodies in the pre-infected offspring  
60 at 34 days PB. All individuals have absorbance values < 2000 indicating that they are not infected with *B. afzelii*. Absorbance values  
61 were obtained from a commercial Lyme disease ELISA.  
62 f Biop1 indicates the spirochete load in the ear biopsy of the pre-infected offspring at 34 days PB. Samples were considered positive  
63 and negative if the *flagellin* gene copy number in the DNA template were > 0 and = 0, respectively.  
64 g ELISA2 absorbance values indicate the strength of the IgG antibody response against *B. afzelii* in the post-infected offspring at 35  
65 days post-infection (PI, which is 70 days post-birth). Individuals with absorbance values > 2000 are infected with *B. afzelii* strain  
66 NE4049 or Fin-Jyv-A3. Absorbance values were obtained from a commercial Lyme disease ELISA.  
67 h Biop2 indicates the spirochete load in the ear biopsy of the post-infected offspring at 35 days PI (70 days PB). Samples were  
68 considered positive and negative if the *flagellin* gene copy number in the DNA template were > 0 and = 0, respectively.  
69 i Ear indicates whether ear tissue tested positive or negative for *B. afzelii* at 70 days PI (105 days PB) using qPCR. Samples were  
70 considered positive and negative if the Cq value was < 38.5 cycles and > 38.5 cycles, respectively.  
71 j Joint indicates whether joint tissue tested positive or negative for *B. afzelii* at 70 days PI (105 days PB) using qPCR. Samples were  
72 considered positive and negative if the Cq value was < 38.5 cycles and > 38.5 cycles, respectively.  
73 k Bladder indicates whether bladder tissue tested positive or negative for *B. afzelii* at 70 days PI (105 days PB) using qPCR. Samples  
74 were considered positive and negative if the Cq value was < 38.5 cycles and > 38.5 cycles, respectively.  
75 l Culture indicates whether live spirochetes were detected in at least one of the organ tissue cultures at 70 days PI (105 days PB).  
76 m Criteria is the number of the six infection criteria for which each female tested positive for *B. afzelii*. These 6 criteria include:  
77 ELISA2, Biop2, ear, joint, bladder, and culture.  
78 n Infected refers to whether the individuals is considered to be infected with *B. afzelii* (Yes) or not (No).  
79 o Offspring V753 had 3 missing criteria (NA). This individual is uninfected because it tested positive for 0 of 3 criteria.  
80 p Offspring Z558 had 5 missing criteria (NA). This individual is infected because it tested positive for 1 of 1 criterion.  
81

82

83 **Table S3. *B. afzelii* infection status of the MatAb+ offspring.** The *B. afzelii* infection status of the MatAb+ offspring is shown  
 84 following the infectious challenge via tick bite with *B. afzelii* strain NE4049 or *B. afzelii* strain Fin-Jyv-A3. The 20 MatAb+ offspring  
 85 were descended from the 6 mothers that were infected with strain NE4049. The 6 infection criteria for the offspring are ELISA2,  
 86 Biop2, Ear, Joint, Bladder, and Culture. Offspring that tested positive for 0 or 1 of the 6 infection criteria were considered as  
 87 uninfected. Offspring that tested positive for 4 or more of the 6 infection criteria were considered as infected with *B. afzelii*.

88

| ID1 <sub>a</sub> | ID2 <sub>b</sub> | Strain <sub>c</sub> | Nymphs <sub>d</sub> | ELISA1 <sub>e</sub> | Biop1 <sub>f</sub> | ELISA2 <sub>g</sub> | Biop2 <sub>h</sub> | Ear <sub>i</sub> | Joint <sub>j</sub> | Bladder <sub>k</sub> | Culture <sub>l</sub> | Criteria <sub>m</sub> | Infected <sub>n</sub> |
|------------------|------------------|---------------------|---------------------|---------------------|--------------------|---------------------|--------------------|------------------|--------------------|----------------------|----------------------|-----------------------|-----------------------|
| V665             | V729             | NE4049              | 3/4                 | 1237                | 0                  | 592                 | 0                  | -                | -                  | -                    | -                    | 0/6                   | No                    |
| V666             | V734             | NE4049              | 2/3                 | 880                 | 0                  | 732                 | 0                  | -                | -                  | -                    | -                    | 0/6                   | No                    |
| V667             | V745             | NE4049              | 3/3                 | 644                 | 0                  | 522                 | 0                  | -                | -                  | -                    | -                    | 0/6                   | No                    |
| V667             | V746             | NE4049              | 2/3                 | 727                 | 0                  | 458                 | 0                  | -                | -                  | -                    | -                    | 0/6                   | No                    |
| V631             | V747             | NE4049              | 2/3                 | 755                 | 0                  | 652                 | 0                  | -                | -                  | -                    | -                    | 0/6                   | No                    |
| V631             | V748             | NE4049              | 2/2                 | 792                 | 0                  | 449                 | 0                  | -                | -                  | -                    | -                    | 0/6                   | No                    |
| V631             | V749             | NE4049              | 2/3                 | 713                 | 0                  | 369                 | 0                  | -                | -                  | -                    | -                    | 0/6                   | No                    |
| V662             | V757             | NE4049              | 3/3                 | 1293                | 0                  | 566                 | 0                  | -                | -                  | -                    | -                    | 0/6                   | No                    |
| Z538             | Z550             | NE4049              | 2/4                 | 615                 | 0                  | 510                 | 0                  | -                | -                  | -                    | -                    | 0/6                   | No                    |
| Z538             | Z551             | NE4049              | 0/3                 | 532                 | 0                  | 428                 | 0                  | -                | -                  | +                    | -                    | 1/6                   | No                    |
| V665             | V730             | Fin-Jyv-A3          | 2/3                 | 1156                | 0                  | 5120                | 62                 | +                | +                  | +                    | +                    | 6/6                   | Yes                   |
| V665             | V731             | Fin-Jyv-A3          | 1/3                 | 1101                | 0                  | 5277                | 547                | +                | +                  | +                    | -                    | 5/6                   | Yes                   |
| V666             | V732             | Fin-Jyv-A3          | 3/3                 | 682                 | 0                  | 6994                | 124                | +                | +                  | +                    | +                    | 6/6                   | Yes                   |
| V667             | V743             | Fin-Jyv-A3          | 1/3                 | 749                 | 0                  | 6379                | 12                 | -                | +                  | +                    | NA                   | 4/5                   | Yes                   |
| V667             | V744             | Fin-Jyv-A3          | 2/3                 | 598                 | 0                  | 7055                | 305                | -                | +                  | +                    | +                    | 5/6                   | Yes                   |
| V631             | V750             | Fin-Jyv-A3          | 3/4                 | 921                 | 0                  | 3567                | 333                | +                | +                  | +                    | +                    | 6/6                   | Yes                   |
| V631             | V751             | Fin-Jyv-A3          | 3/4                 | 882                 | 0                  | 2441                | 614                | +                | -                  | +                    | +                    | 5/6                   | Yes                   |
| V662             | V756             | Fin-Jyv-A3          | 1/3                 | 1392                | 0                  | 758                 | 0                  | -                | -                  | -                    | -                    | 0/6                   | No                    |
| Z538             | Z552             | Fin-Jyv-A3          | 1/2                 | 785                 | 0                  | 5556                | 84                 | +                | +                  | +                    | -                    | 5/6                   | Yes                   |
| Z538             | Z553             | Fin-Jyv-A3          | 2/3                 | 524                 | 0                  | 3997                | 1022               | +                | +                  | +                    | +                    | 6/6                   | Yes                   |

89  
90 a ID1 is the unique identification number of each mother bank vole that give birth to the offspring.  
91 b ID2 is the unique identification number of each offspring bank vole.  
92 c Strain refers to the strain of *B. afzelii* with which the offspring were challenged via tick bite at 35 days post-birth (PB): strain  
93 NE4049 or strain Fin-Jyv-A3.  
94 d Nymphs gives a fraction where the numerator and denominator refer to the number of engorged *B. afzelii*-infected nymphs and the  
95 number of engorged nymphs, respectively, collected for each offspring bank vole.  
96 e ELISA1 absorbance values indicate the level of maternally transmitted *B. afzelii*-specific IgG antibodies in the pre-infected offspring  
97 at 34 days PB. All individuals have absorbance values < 2000 indicating that they are not infected with *B. afzelii*. Absorbance values  
98 were obtained from a commercial Lyme disease ELISA.  
99 f Biop1 indicates the spirochete load in the ear biopsy of the pre-infected offspring at 34 days PB.  
100 g ELISA2 absorbance values indicate the strength of the IgG antibody response against *B. afzelii* in the post-infected offspring at 35  
101 days post-infection (PI, which is 70 days post-birth). Individuals with absorbance values > 2000 are infected with *B. afzelii* strain  
102 NE4049 or Fin-Jyv-A3. Absorbance values were obtained from a commercial Lyme disease ELISA.  
103 h Biop2 indicates the spirochete load in the ear biopsy of the post-infected offspring at 35 days PI (70 days PB).  
104 i Ear indicates whether ear tissue tested positive or negative for *B. afzelii* at 70 days PI (105 days PB) using qPCR.  
105 j Joint indicates whether joint tissue tested positive or negative for *B. afzelii* at 70 days PI (105 days PB) using qPCR.  
106 k Bladder indicates whether bladder tissue tested positive or negative for *B. afzelii* at 70 days PI (105 days PB) using qPCR.  
107 l Culture indicates whether live spirochetes were detected in at least one of the organ tissue cultures at 70 days PI (105 days PB).  
108 m Criteria is the number of the six infection criteria for which each female tested positive for *B. afzelii*. These 6 criteria include:  
109 ELISA2, Biop2, ear, joint, bladder, and culture.  
110 n Infected refers to whether the individuals is considered to be infected with *B. afzelii* (Yes) or not (No).  
111  
112

113 Section 1 – Creation of *I. ricinus* nymphs infected with *B. afzelii*

114

115 The nymphs used for the experimental infections were created as follows.  
116 BALB/c mice were infected with *B. afzelii* strain NE4049 or Fin-Jyv-A3 via tick bite. At  
117 4 weeks post-infection (PI), the mice were infested with larval ticks from our *I. ricinus*  
118 colony. The engorged larval ticks were stored in individual 1.7 ml Eppendorf tubes; each  
119 tube contained a piece of moistened paper towel to ensure high humidity. The engorged  
120 larvae were kept at room temperature under ambient light conditions and were allowed to  
121 molt into nymphs. A random sample of nymphs was tested to determine the infection  
122 prevalence, which was 77.9% (67 infected nymphs/ 86 total nymphs) for NE4049 and  
123 91.8% (67 infected nymphs/ 73 total nymphs) for Fin-Jyv-A3. Larval *I. ricinus* ticks were  
124 also fed on uninfected BALB/c mice to create uninfected control nymphs.

125

126

127 Section 2 – Antibody response against *B. afzelii* in the bank vole mothers

128 The raw data for the *B. afzelii*-specific IgG antibody response in the mother at 35  
129 days post-infection (PI) are shown in Table S1 in the column titled ‘ELISA’.

130 To test whether the bank vole mothers developed an IgG antibody response  
131 against *B. afzelii* at 35 days post-infection (PI), we compared this variable (the ELISA  
132 variable in Table S1) between infected mothers (n = 6) and uninfected control mothers (n  
133 = 7) using an independent two sample t-test. The IgG antibody response against *B. afzelii*  
134 was log<sub>10</sub>-transformed to improve the normality of the residuals.

135 The mean *B. afzelii*-specific IgG antibody response of the infected mothers (mean  
136 = 3811, 95% CI = 2692–5395) at 35 days PI was 7.4 times higher compared to the  
137 uninfected control mothers (mean = 512, 95% CI = 371–706), and this difference was  
138 significant (Figure S1; t = -9.335, df = 11, p < 0.001). This result shows that infected  
139 bank vole mothers developed a strong IgG antibody response against the *B. afzelii*  
140 infection.

141

142



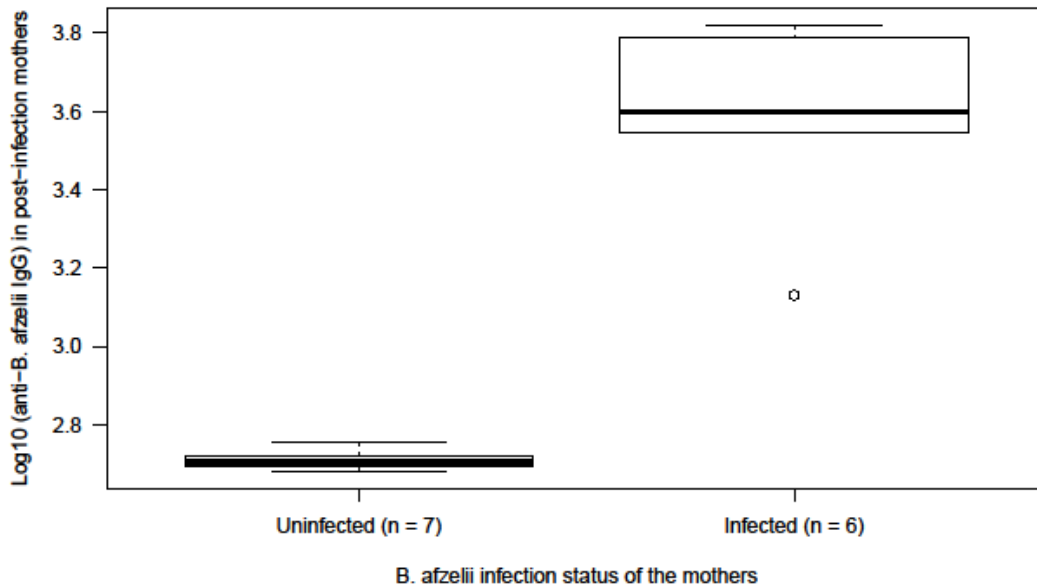

143  
 144  
 145  
 146  
 147  
 148  
 149  
 150

Figure S1. The *B. afzelii*-specific IgG antibody response of the infected bank vole mothers at 35 days post-infection (n = 6) was 7.4 times higher compared to the uninfected control bank vole mothers (n = 7). The strength of the *B. afzelii*-specific IgG antibody response was measured in absorbance units using a commercial Lyme disease ELISA. The infected mothers and the uninfected control mothers produced the MatAb+ and the MatAb- bank vole offspring, respectively.

151 **Section 3 – Maternal antibody transmission differs among bank vole mothers**

152 The raw data for the level of maternally transmitted IgG antibodies in the  
153 offspring at 34 days post-birth (PB) are shown in Tables S2 and S3 in the column titled  
154 ‘ELISA1’. The raw data for the *B. afzelii*-specific IgG antibody response in the mother at  
155 35 days post-infection (PI) are shown in Table S1 in the column titled ‘ELISA’.

156 There were significant differences among infected bank vole mothers ( $n = 6$ ) in  
157 the level of maternally transmitted IgG antibodies present in their offspring at 34 days PB  
158 (Figure S2; one-way ANOVA:  $F_{12, 28} = 29.25$ ,  $p < 0.001$ ). However, there was no  
159 correlation between the strength of the *B. afzelii*-specific IgG antibody response in the  
160 mother at 35 days PI and the level of maternally transmitted *B. afzelii*-specific IgG  
161 antibodies in the offspring at 34 days PB (Figure S2;  $r = 0.361$ ,  $df = 18$ ,  $p = 0.118$ ).

162 One possible explanation for this result is as follows. The antibody levels of the  
163 mothers were measured at 35 days PI, whereas the females were coupled with males at 2  
164 and at 6 weeks PI. Thus the window of maternal antibody transmission occurred at 5–8,  
165 or 9–12 weeks PI depending on whether the female produced her first litter with the first  
166 or second male. This variation in the time lag between maternal infection and  
167 reproduction may explain the lack of a relationship in the IgG antibodies levels between  
168 bank vole mothers and their offspring.

169

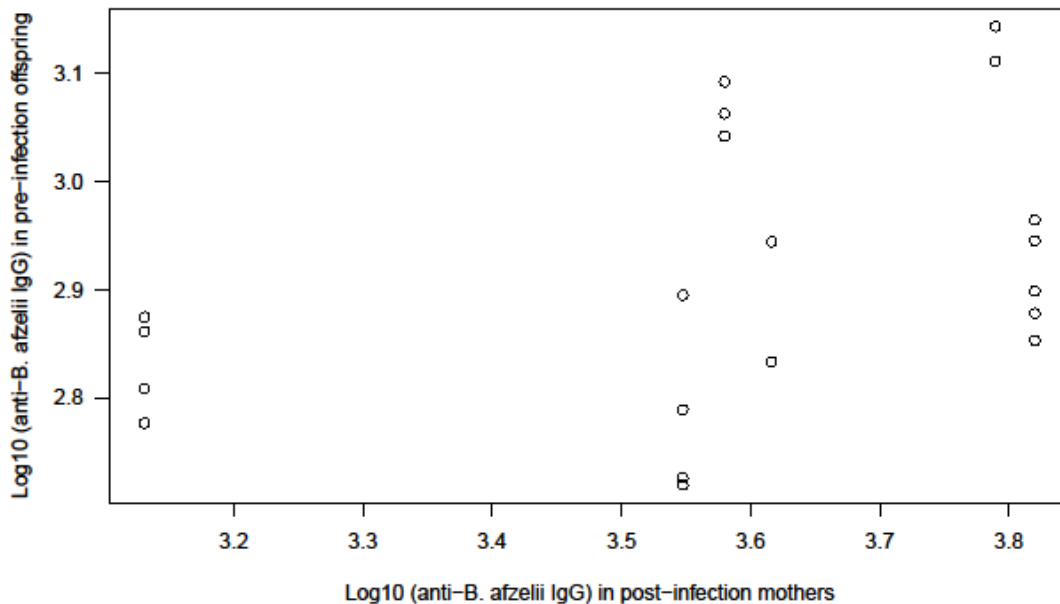

170  
171 Figure S2. The relationship between the *B. afzelii*-specific IgG antibody response of the  
172 infected bank vole mothers ( $n = 6$ ) at 35 days post-infection and the level of maternally  
173 transmitted *B. afzelii*-specific IgG antibodies of their MatAb+ offspring ( $n = 20$ ) at 34  
174 days post-birth was not significant. There were significant differences in the level of  
175 maternally transmitted *B. afzelii*-specific IgG antibodies among the 6 families of bank  
176 voles. In the graph, each of the 6 families is shown by a vertical cluster of data points.

177

178

179

## 180 Section 4 – The maternally transmitted IgG antibodies are specific for the 181 OspC antigen

182 The maternally transmitted OspC-specific IgG antibody level in the offspring  
183 before the infectious challenge (34 days PB) was measured using a homemade ELISA  
184 with recombinant OspC (rOspC) proteins A3 and A10 [1]. 96-well tissue culture plates  
185 were coated overnight at 4°C with rOspC proteins A3 and A10 (1 µg of protein per well).  
186 Wells were washed three times with PBS-Tween 0.1% between each step. The plate was  
187 incubated with a BSA 2% blocking solution for 2 hours, followed by the bank vole serum  
188 samples (diluted 1:100 in 1x PBS) for 45 minutes, and the secondary antibody for 45  
189 minutes (diluted 1:5000 in 1x PBS). The secondary antibody was a goat anti-*Mus*  
190 *musculus* IgG conjugated to horseradish peroxidase. After adding 100 µl of TMB, we  
191 measured the absorbance at 652 nm every 2 minutes for one hour using a plate reader  
192 (Synergy HT, Multi-detection plate reader, Bio-Tek, United States). The level of IgG  
193 antibodies against each rOspC antigen in the offspring was determined by integrating the  
194 area under the absorbance versus time curve and is measured in absorbance units.

195 The specificity of the maternally transmitted IgG antibodies against the OspC  
196 antigen in the naive bank vole offspring (i.e., before the infectious challenge at 35 days  
197 PB) was quantified as follows. For each offspring, we measured the ability of the  
198 maternally transmitted IgG antibodies (sampled from offspring at 34 days PB) to bind  
199 recombinant outer surface protein C (rOspC) A10 and rOspC A3 using a homemade  
200 ELISA. We calculated an OspC A10 specificity ratio for each offspring by dividing the  
201 level of IgG antibodies that bound to rOspC A10 by the level of IgG antibodies that  
202 bound to rOspC A3. Thus, the OspC A10 specificity ratio measures the ability of the  
203 maternally transmitted antibodies to recognize the maternal OspC A10 antigen compared  
204 to the foreign OspC A3 antigen. The OspC A10 specificity ratio was log<sub>10</sub>-transformed  
205 to improve the normality of the residuals.

206 We compared the log<sub>10</sub>-transformed OspC A10 specificity ratio in the pre-  
207 infection blood sample (at 34 days PB) between the MatAb+ offspring and the MatAb-  
208 offspring using an independent two samples t-test. The OspC specificity ratio in the  
209 MatAb+ offspring was 3.07 times higher compared to the MatAb- offspring, and this  
210 difference was significant (independent two samples t-test:  $t = -10.015$ ,  $df = 39$ ,  $p <$   
211  $0.001$ ). This result shows that the preference of the maternally transmitted IgG antibodies  
212 for the OspC A10 antigen (compared to the OspC A3 antigen) was stronger in the  
213 MatAb+ offspring compared to the MatAb- offspring (Figure S3). For the MatAb+  
214 offspring, the mean log<sub>10</sub>-transformed OspC A10 specificity ratio was 0.45 (95% CI =  
215 0.40–0.50) and this was significantly greater than 0 (paired samples t-test:  $t = 18.145$ ,  $df$   
216  $= 18$ ,  $p < 0.001$ ). This result shows that the infected mothers transmitted IgG antibodies  
217 to their offspring that were specific for OspC A10. For the MatAb- offspring, the mean  
218 log<sub>10</sub>-transformed OspC A10 specificity ratio was 0.15 (95% CI = 0.11–0.18) and this  
219 was also significantly different from 0 (paired samples t-test:  $t = 7.981$ ,  $df = 21$ ,  $p <$   
220  $0.001$ ). Thus, even in the absence of OspC-specific antibodies, the rOspC A10 antigen  
221 induced a stronger color reaction than the rOspC A3 antigen. This result suggests that the  
222 rOspC A10 antigen is better at binding mouse IgG or the secondary antibody compared to  
223 rOspC A3.

224

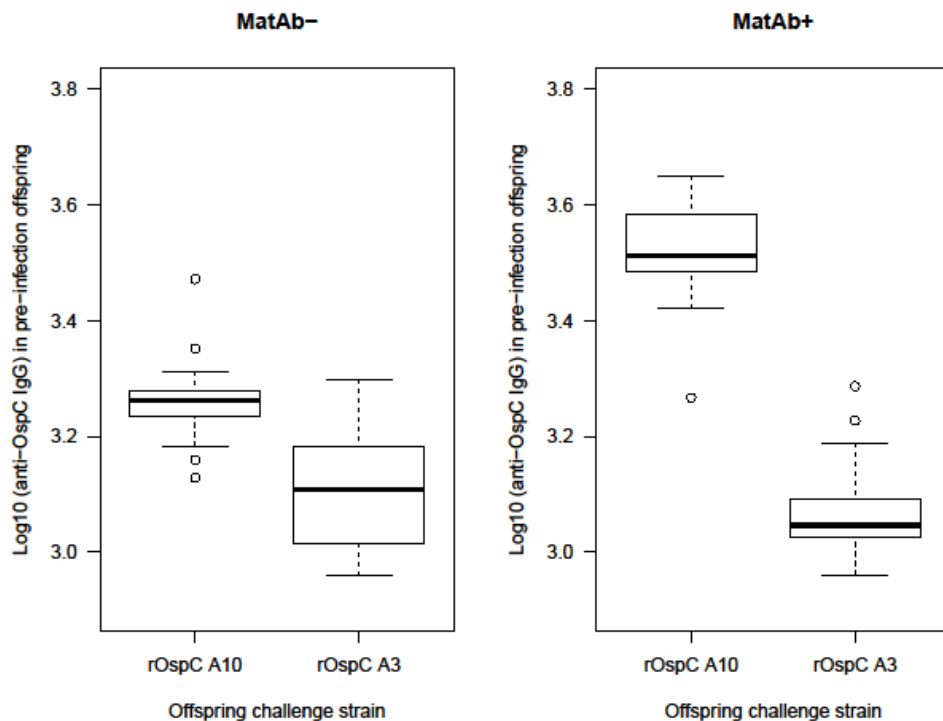

225  
226  
227

228 Figure S3. The ability of maternally transmitted IgG antibodies to bind *B. afzelii* OspC  
229 antigens A10 and A3 is shown for the MatAb- offspring (left panel) and the MatAb+  
230 offspring (right panel). Blood samples were taken from the pre-infection offspring at 34  
231 days post-birth. For the MatAb+ offspring, the ability of the maternally transmitted IgG  
232 antibodies to bind rOspC A10 was 2.82 times stronger compared to rOspC A3. For the  
233 MatAb- offspring, the ability of the maternally transmitted IgG antibodies to bind rOspC  
234 A10 was 1.40 times stronger compared to rOspC A3. The left panel of the graph suggests  
235 that our homemade ELISA is biased towards the rOspC A10 antigen because the serum  
236 samples from the pre-infection MatAb- offspring (which are not expected to have any *B.*  
237 *afzelii*-specific antibodies) bound more strongly to the rOspC A10 antigen compared to  
238 the rOspC A3 antigen. Despite this bias, this graph also shows that the serum samples of  
239 the pre-infection MatAb+ offspring bound much more strongly to the rOspC A10 antigen  
240 (right panel) compared to the MatAb- offspring (left panel). In contrast, the ability of the  
241 maternally transmitted antibodies to bind the rOspC A3 antigen was similar between the  
242 MatAb+ and MatAb- offspring.

243

244 **Section 5 – The *B. afzelii*-specific IgG antibody levels changed dramatically**  
245 **after offspring were exposed to infected nymphs**

246 For the bank vole offspring, the pre-infection blood sample was taken at 34 days  
247 post-birth (PB), whereas the post-infection blood sample was taken at 35 days post-  
248 infection (PI), which corresponds to 70 days PB. The raw data for the level of *B. afzelii*-  
249 specific IgG antibodies in the pre-infection and post-infection blood samples are shown  
250 in Tables S2 and S3 in the columns titled ‘ELISA1’ and ‘ELISA2’, respectively.

251 The level of *B. afzelii*-specific IgG antibodies increased dramatically from the  
 252 pre-infection blood sample to the post-infection blood sample for the MatAb- offspring  
 253 (left column in Figure S4) and for the MatAb+ offspring that were challenged with strain  
 254 Fin-Jyv-A3 (bottom-right panel in Figure S4). This result indicates that all of these  
 255 offspring acquired *B. afzelii* following the infectious challenge. One MatAb+ offspring  
 256 (V756) was protected from infectious challenge with strain Fin-Jyv-A3 (bottom-right  
 257 panel in Figure S4). The level of *B. afzelii*-specific IgG antibody response decreased from  
 258 the pre-infection blood sample to the post-infection blood sample for the MatAb+  
 259 offspring that were challenged with strain NE4049 (top-right panel in Figure S4). This  
 260 result indicates that the MatAb+ offspring were protected against the infectious challenge  
 261 with strain NE4049 and that the level of maternal antibodies in these offspring waned  
 262 over time.  
 263

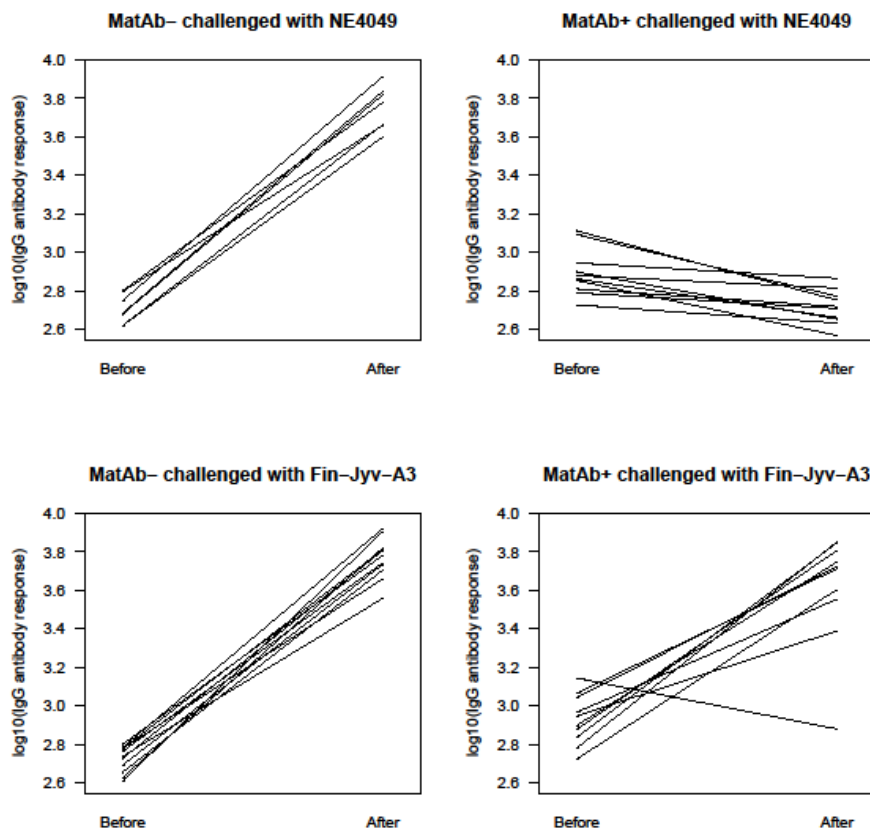

264  
 265  
 266 Figure S4. Interaction plot that shows the level of *B. afzelii*-specific IgG antibodies in the  
 267 offspring before and after the infectious challenge. The pre-infection blood sample was  
 268 taken at 34 days post-birth; the post-infection blood sample was taken at 35 days post-  
 269 infection, which corresponds to 70 days post-birth. The MatAb- (left column) and  
 270 MatAb+ (right column) refer to the offspring without and with maternal antibodies  
 271 against *B. afzelii* strain NE4049, respectively. The offspring were either challenged with  
 272 strain NE4049 or strain Fin-Jyv-A3. The MatAb- offspring (left column) were equally  
 273 susceptible to both strains. The MatAb+ offspring were protected against the maternal

274 strain (NE4049; top-right panel) but not the new strain (Fin-Jyv-A3; bottom-right panel).  
275 The top-right panel also shows that the level of maternal IgG antibodies in the MatAb+  
276 offspring waned over time.

277

## 278 Section 6 – The *B. afzelii* spirochete load in the ear tissue changed 279 dramatically after offspring were exposed to infected nymphs

280 For the bank vole offspring, the pre-infection ear tissue biopsy was taken at 34  
281 days post-birth (PB), whereas the post-infection ear tissue biopsy was taken at 35 days  
282 post-infection (PI), which corresponds to 70 days PB. The raw data for the spirochete  
283 loads in the pre-infection and post-infection ear tissue biopsies are shown in Tables S2  
284 and S3 in the columns titled ‘Biop1’ and ‘Biop2’, respectively.

285 The *B. afzelii* spirochete load in the ear tissue increased dramatically from the pre-  
286 infection ear biopsy to the post-infection ear biopsy for the MatAb- offspring (left  
287 column in Figure S5) and for the MatAb+ offspring that were challenged with strain Fin-  
288 Jyv-A3 (bottom-right panel in Figure S5). This result indicates that all of these offspring  
289 acquired *B. afzelii* following the infectious challenge. One MatAb+ offspring (V756) was  
290 protected from infectious challenge with strain Fin-Jyv-A3 (bottom-right panel in Figure  
291 S5). The *B. afzelii* spirochete load in the ear tissue was zero for the pre- and post-  
292 infection ear biopsies of the MatAb+ offspring that were challenged with strain NE4049  
293 (top-right panel in Figure S7). This result indicates that the MatAb+ offspring were  
294 protected against the infectious challenge with strain NE4049. Figure S5 also shows that  
295 there is no vertical transmission of *B. afzelii* from mothers to their offspring.

296

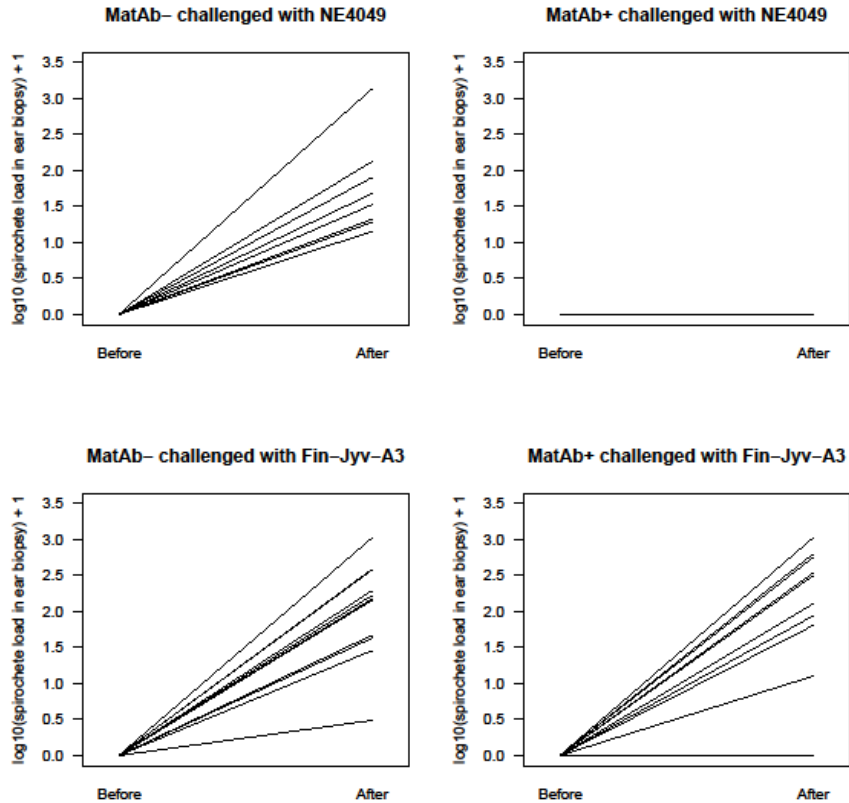

297  
 298  
 299  
 300  
 301  
 302  
 303  
 304  
 305  
 306  
 307  
 308  
 309

Figure S5. Interaction plot that shows the ear biopsy spirochete loads of the offspring before and after the infectious challenge. The pre-infection ear biopsy was taken at 34 days post-birth; the post-infection ear biopsy was taken at 35 days post-infection, which corresponds to 70 days post-birth. The MatAb- (left column) and MatAb+ (right column) refer to the offspring without and with maternal antibodies against *B. afzelii* strain NE4049, respectively. The offspring were either challenged with strain NE4049 or strain Fin-Jyv-A3. The MatAb- offspring (left column) were equally susceptible to both strains. The MatAb+ offspring were protected against the maternal strain (NE4049; top-right panel) but not the new strain (Fin-Jyv-A3; bottom-right panel). Figure S7 shows that there is no vertical transmission of *B. afzelii* from mothers to their offspring.

310 **Section 7 – Culture of tissue biopsies to detect live *B. afzelii* spirochetes**

311 The tissue biopsy culture confirmed the detection of live spirochetes in most  
 312 animals (Table S3 and Table S4). Live spirochetes were found for 0% (0/9) of the  
 313 MatAb+/NE4049 offspring, 66.6% (6/9) of the MatAb+/Fin-Jyv-A3 offspring, 75% (6/8)  
 314 of the MatAb-/NE4049 offspring, and 72.7% (8/11) of the MatAb-/Fin-Jyv-A3 offspring.  
 315 In summary, live spirochetes were recovered from tissue samples for most of the infected  
 316 animals (71.4% = 20/28), but for none of the uninfected animals (0.0% = 0/9).  
 317

318 **Section 8 – The *ospC*-specific qPCR to confirm identity of infecting strain**

319 Strain NE4049 carries *ospC* allele A10 and strain Fin-Jyv-A3 carries *ospC* allele  
320 A3. The *ospC*-specific qPCR confirmed that all animals were infected with the expected  
321 strain (Table S3 and Table S4). Spirochetes carrying *ospC* allele A10 were detected in  
322 0% (0/9) of the MatAb+/NE4049 offspring (i.e. because these individuals were protected  
323 from the infectious challenge with strain NE4049), 0% (0/10) of the MatAb+/Fin-Jyv-A3  
324 offspring, 100% (8/8) of the MatAb-/NE4049 offspring, and 0% (0/11) of the MatAb-  
325 /Fin-Jyv-A3. In contrast, spirochetes carrying *ospC* allele A3 were detected in 0% (0/9)  
326 of the MatAb+/NE4049 offspring, 100% (10/10) of the MatAb+/Fin-Jyv-A3 offspring,  
327 0% (0/8) of the MatAb-/NE4049 offspring, and 100% (11/11) of the MatAb-/Fin-Jyv-A3  
328 offspring. In summary, the *ospC* allele corresponding to the expected strain was always  
329 found in the tissues of the experimentally infected bank vole offspring.

330

331

332

References

333

- 334 1. Jacquet M., Durand J., Rais O., Voordouw M.J. 2015 Cross-reactive acquired  
335 immunity influences transmission success of the Lyme disease pathogen, *Borrelia afzelii*.  
336 *Infection Genetics and Evolution* **36**, 131-140. (doi:10.1016/j.meegid.2015.09.012).

337
